# Supplementary material for: Alkylaluminum dichloride–ether complexes which are fully soluble in hydrocarbons as catalysts for the synthesis of exo-olefin terminated polyisobutylene at room temperature
Source: Royal Society of Chemistry journal article supplement (doi:10.1039/c4py00069b), 2014-01-01
Supplement: c4py00069b1.pdf [file c4py00069b1.pdf]

## Electronic Supplementary Information

Alkylaluminum dichloride–ether complexes which  
are fully soluble in hydrocarbons as catalysts for the  
synthesis of exo-olefin terminated polyisobutylene  
at room temperature

**Irina V. Vasilenko, Dmitriy I. Shiman, and Sergei V. Kostjuk\***

Research Institute for Physical Chemical Problems of the Belarusian State University, 14

Leningradskaya st., 220030 Minsk, Belarus

E-mail: [kostjuks@bsu.by](mailto:kostjuks@bsu.by), [kostjuks@rambler.ru](mailto:kostjuks@rambler.ru)

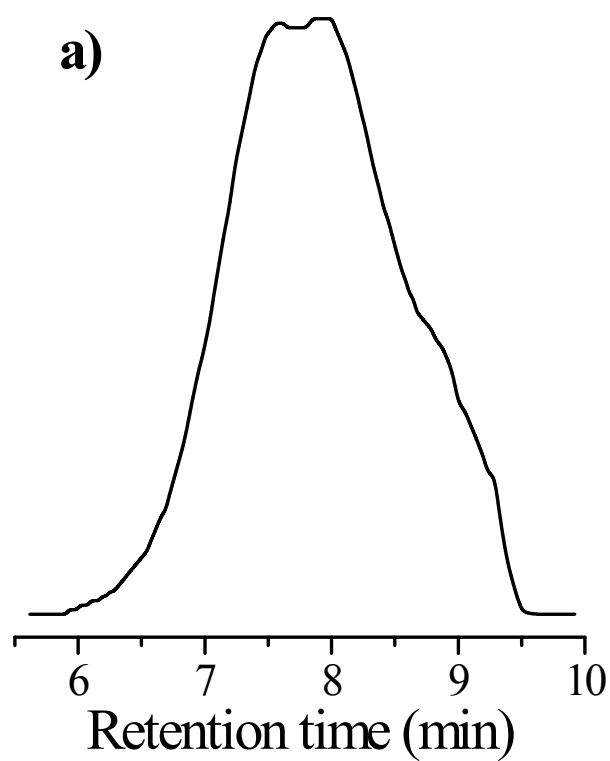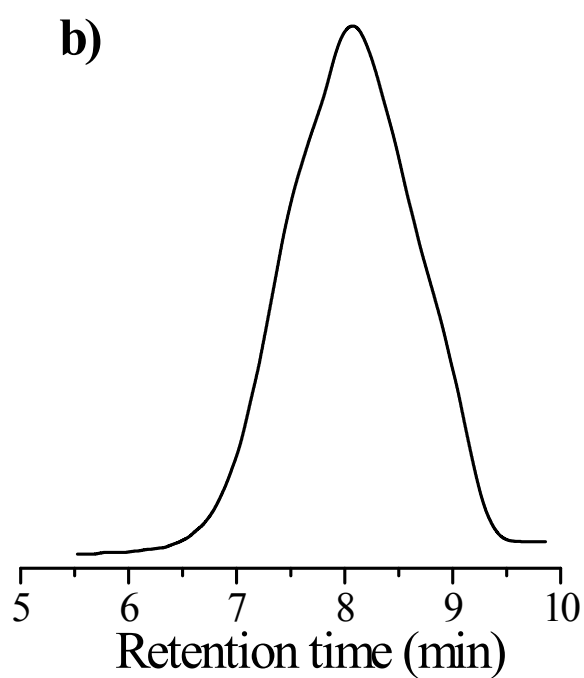

**Figure S1.** SEC traces of poly(isobutylene)s synthesized by the cationic polymerization of isobutylene with  $\text{H}_2\text{O}/\text{EtAlCl}_2 \times 0.8\text{O}^i\text{Pr}_2$  initiating system at  $10^\circ\text{C}$  in *n*-hexane at  $[\text{M}] = 5.8\text{ M}$ : **(a)** run 9, Table 2; **(b)** run 10, Table 2.

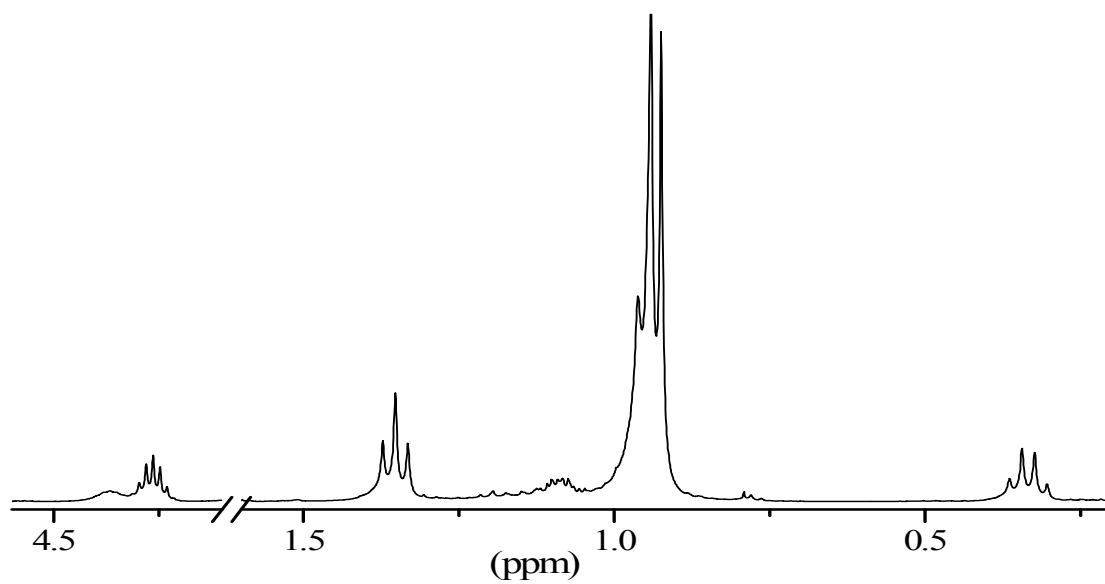

**Figure S2.** Part of  $^1\text{H}$  NMR spectrum of  $\text{EtAlCl}_2 \times \text{O}^i\text{Pr}_2$  (0.05M) in  $\text{C}_6\text{D}_6$  at 25  $^\circ\text{C}$ .

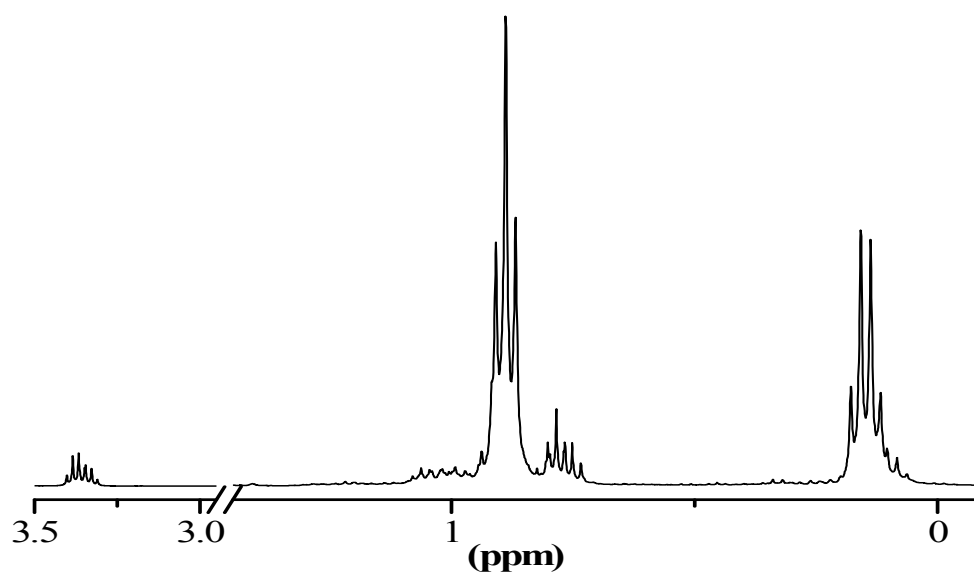

**Figure S3.** Part of  $^1\text{H}$  NMR spectrum of  $\text{EtAlCl}_2$  (0.05M) in  $\text{C}_6\text{D}_6$  at 25  $^\circ\text{C}$ .

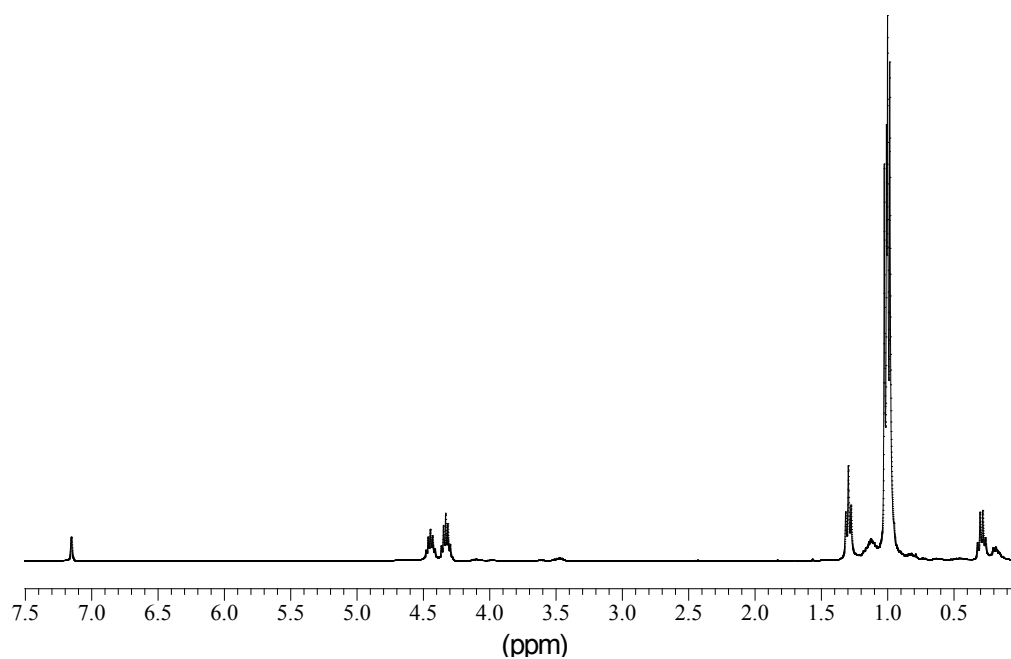

**Figure S4.**  $^1\text{H}$  NMR spectrum of  $\text{EtAlCl}_2 \cdot \text{OPr}_2$  (0.1 M) in  $\text{C}_6\text{D}_6$  at 25 °C

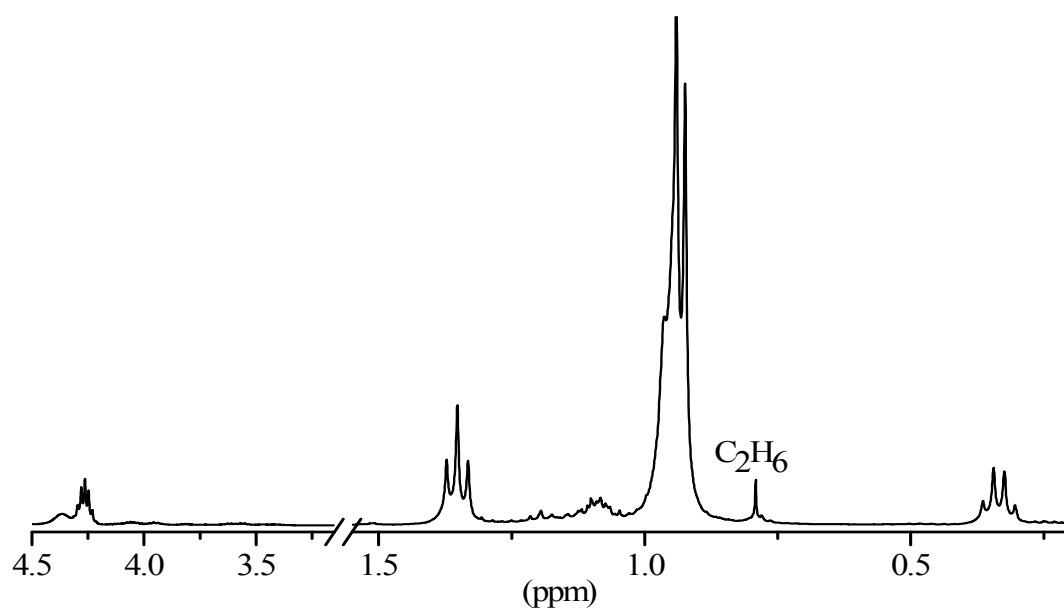

**Figure S5.** Part of  $^1\text{H}$  NMR spectrum of  $\text{EtAlCl}_2 \cdot \text{OPr}_2$  (0.05M) after reaction with water during 10 min in  $\text{C}_6\text{D}_6$  at 25 °C

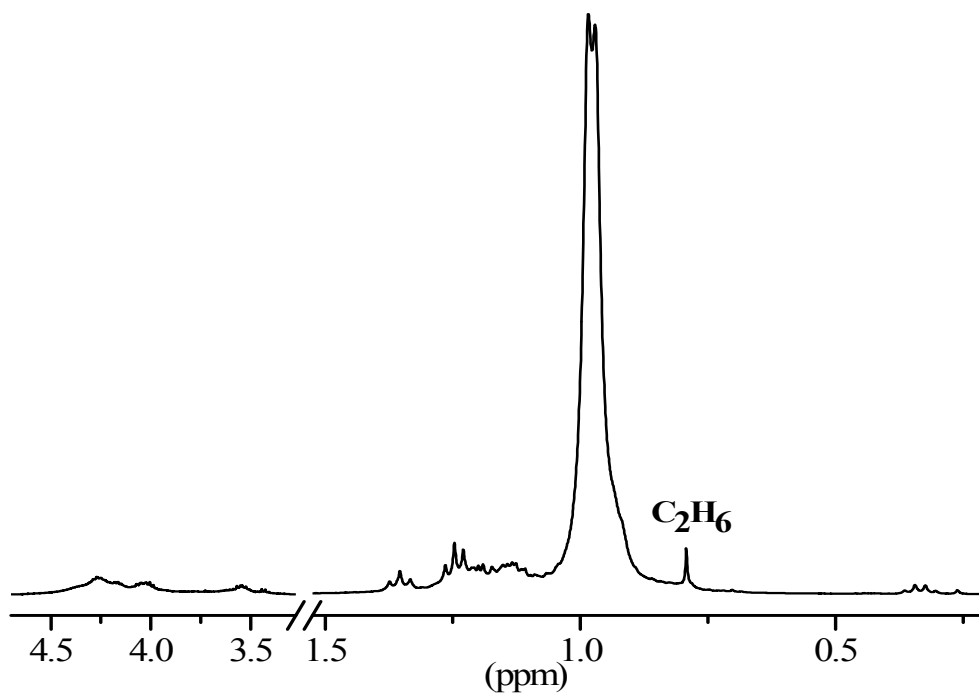

**Figure S6.** Part of  $^1\text{H}$  NMR spectra of  $\text{EtAlCl}_2 \times \text{O}'\text{Pr}_2$  after reaction with water during 10 h in  $\text{C}_6\text{D}_6$  at 25 °C.
